# Supplementary material
Source: PubMed Central journal article supplement (PMC3484657)
Supplement: mmc1.pdf [file mmc1.pdf]

## Supplemental Data

### A Population-Based Study of Autosomal-Recessive Disease-Causing Mutations in a Founder Population

Jessica X. Chong, Rebecca Ouwenga, Rebecca L. Anderson, Darrel J. Waggoner, and Carole Ober

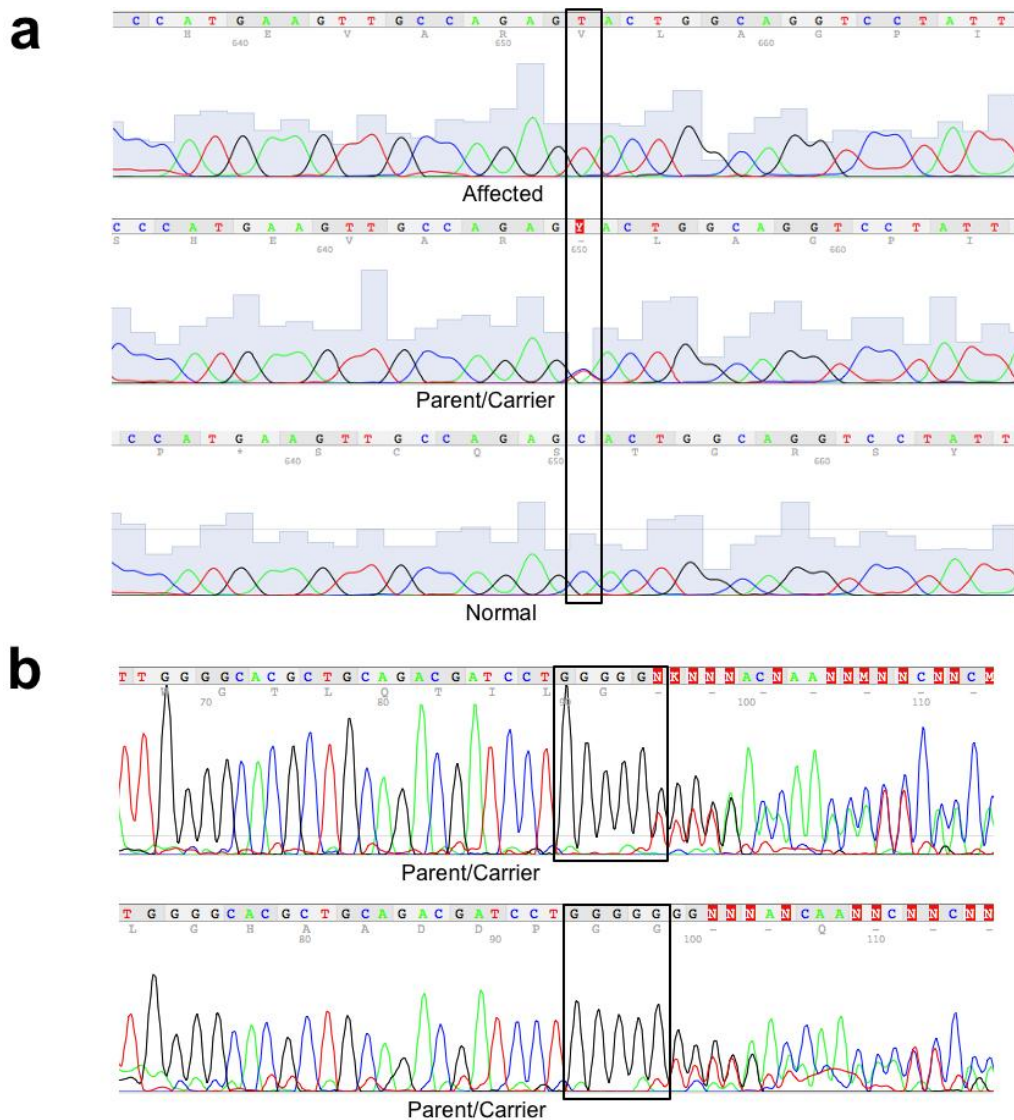

**Figure S1. Sanger Sequencing Traces for (A) *TYR* p.Cys91Tyr in an Adult with Albinism, a Parent of Children with Albinism, and a Normal Control and (B) *GJB2* c.35delG in Both Parents of Deaf Children**

*TYR* p.Cys91Tyr is novel, although Chaki et al. reported an albinism-causing mutation, p.Cys91Ser, at the same amino acid.<sup>1</sup> This residue is highly conserved and may disrupt disulfide bond formation. The *GJB2* c.35delG mutation is the most common cause of nonsyndromic AR deafness in Europeans.<sup>2</sup>

S2

| Position       | A |   | 1 |   | 2 |   | 3 |   | 4 |   | 5 |   | 6 |   | Subject Haplotype |
|----------------|---|---|---|---|---|---|---|---|---|---|---|---|---|---|-------------------|
|                | a | b | b | b | b | b | b | b | b | b | b | b | c |   |                   |
| 116,681,031    | G | A | A | A | A | A | A | A | A | A | A | A | A | A | A                 |
| 116,688,396    | G | A | A | A | A | A | A | A | A | A | A | A | A | A | A                 |
| 116,690,486    | G | A | A | A | A | A | A | A | A | A | A | A | A | A | A                 |
| 116,691,764    | A | G | G | G | G | G | G | G | G | G | G | G | G | A | G                 |
| 116,693,918    | G | A | A | A | A | A | A | A | A | A | A | A | A | A | A                 |
| 116,694,148    | A | T | T | T | T | T | T | T | T | T | T | T | T | T | T                 |
| 116,701,279    | G | A | A | A | A | A | A | A | A | A | A | A | A | A | A                 |
| 116,713,868    | C | G | G | G | G | G | G | G | G | G | G | G | G | A | G                 |
| 116,718,335    | T | T | T | T | T | T | T | T | T | T | T | T | T | T | T                 |
| 116,739,977    | C | A | A | A | A | A | A | A | A | A | A | A | A | A | C                 |
| 116,742,021    | C | A | A | A | A | A | A | A | A | A | A | A | A | A | C                 |
| 116,801,308    | C | T | T | T | T | T | T | T | T | T | T | T | T | T | C                 |
| 116,810,473    | C | T | T | T | T | T | T | T | T | T | T | T | T | T | C                 |
| 116,810,771    | A | G | G | G | G | G | G | G | G | G | G | G | G | G | A                 |
| 116,814,236    | T | T | T | T | T | T | T | T | T | T | T | T | T | T | T                 |
| 116,823,837    | A | A | A | A | A | A | A | A | A | A | A | A | A | A | A                 |
| 116,831,918    | C | C | C | C | C | C | C | C | C | C | C | C | C | C | C                 |
| 116,832,492    | T | T | T | T | T | T | T | T | T | T | T | T | T | T | T                 |
| 116,835,318    | T | C | C | C | C | C | C | C | C | C | C | C | C | T | T                 |
| 116,847,158    | G | G | G | G | G | G | G | G | G | G | G | G | G | G | G                 |
| 116,866,465    | C | C | C | C | C | C | C | C | C | C | C | C | C | C | C                 |
| 116,874,378    | C | T | T | T | T | T | T | T | T | T | T | T | T | T | C                 |
| 116,891,743    | T | C | C | C | C | C | C | C | C | C | C | C | C | T | T                 |
| 116,903,419    | C | T | T | T | T | T | T | T | T | T | T | T | T | T | C                 |
| 116,907,253 bp | G | C | C | C | C | C | C | C | C | C | C | C | C | C | C                 |
| 116,922,261    | A | G | G | G | G | G | G | G | G | G | G | G | G | G | G                 |
| 116,922,448    | A | G | G | G | G | G | G | G | G | G | G | G | G | G | G                 |
| 116,950,190    | G | A | A | A | A | A | A | A | A | A | A | A | A | A | A                 |
| 116,950,283    | T | T | T | T | T | T | T | T | T | T | T | T | T | T | A                 |
| 116,963,484    | G | A | A | A | A | A | A | A | A | A | A | A | A | A | A                 |
| 116,966,165    | C | C | C | C | C | C | C | C | C | C | C | C | C | C | T                 |
| 116,977,939    | G | G | G | G | G | G | G | G | G | G | G | G | G | G | A                 |
| 116,987,717    | G | C | C | C | C | C | C | C | C | C | C | C | C | C | C                 |
| 117,016,773    | A | T | T | T | T | T | T | T | T | T | T | T | T | T | A                 |
| 117,069,880    | A | A | A | A | A | A | A | A | A | A | A | A | A | A | A                 |
| 117,080,788    | A | A | A | A | A | A | A | A | A | A | A | A | A | A | A                 |
| 117,087,495    | C | C | C | C | C | C | C | C | C | C | C | C | C | C | C                 |
| 117,090,381    | G | G | G | G | G | G | G | G | G | G | G | G | G | T | T                 |
| 117,090,479    | G | G | G | G | G | G | G | G | G | G | G | G | G | G | G                 |
| 117,092,387    | C | C | C | C | C | C | C | C | C | C | C | C | C | C | C                 |
| 117,125,148    | C | C | C | C | C | C | C | C | C | C | C | C | C | C | C                 |
| 117,125,184    | G | G | G | G | G | G | G | G | G | G | G | G | G | G | G                 |
| 117,128,222    | G | G | G | G | G | G | G | G | G | G | G | G | G | G | G                 |
| 117,144,129    | A | A | A | A | A | A | A | A | A | A | A | A | A | A | A                 |
| 117,178,255    | A | A | A | A | A | A | A | A | A | A | A | A | A | A | A                 |
| 117,180,752    | A | A | A | A | A | A | A | A | A | A | A | A | A | A | A                 |
| 117,211,096    | C | C | C | C | C | C | C | C | C | C | C | C | C | C | C                 |
| 117,220,692    | T | T | T | T | T | T | T | T | T | T | T | T | T | T | T                 |
| 117,255,292    | G | G | G | G | G | G | G | G | G | G | G | G | G | G | G                 |
| 117,285,697    | T | T | T | T | T | T | T | T | T | T | T | T | T | T | T                 |
| 117,291,218    | G | T | T | T | T | T | T | T | T | T | T | T | T | T | T                 |
| 117,319,388    | A | G | G | G | G | G | G | G | G | G | G | G | G | G | G                 |
| 117,330,143    | T | T | T | T | T | T | T | T | T | T | T | T | T | T | T                 |
| 117,337,480    | C | C | C | C | C | C | C | C | C | C | C | C | C | T | T                 |
| 117,354,473    | C | C | C | C | C | C | C | C | C | C | C | C | C | C | C                 |
| 117,366,098    | C | C | C | C | C | C | C | C | C | C | C | C | C | C | C                 |
| 117,401,456    | G | A | A | A | A | A | A | A | A | A | A | A | A | A | A                 |
| 117,409,113    | G | A | A | A | A | A | A | A | A | A | A | A | A | A | A                 |
| 117,439,302    | A | A | A | A | A | A | A | A | A | A | A | A | A | A | G                 |
| 117,439,807    | C | A | A | A | A | A | A | A | A | A | A | A | A | A | A                 |
| 117,455,319    | T | C | 0 | 0 | C | C | C | C | C | C | C | C | C | C | C                 |
| 117,458,974    | A | T | T | T | T | T | T | T | T | T | T | T | T | T | A                 |
| 117,467,505    | T | T | T | T | T | T | T | T | T | T | T | T | T | T | T                 |
| 117,469,337    | T | C | C | C | C | C | C | C | C | C | C | C | C | C | C                 |
| 117,492,529    | T | C | C | C | C | C | C | C | C | C | C | C | C | C | C                 |
| 117,494,982    | G | G | G | G | G | G | G | G | G | G | G | G | G | G | G                 |
| 117,504,272    | A | A | A | A | A | A | A | A | A | A | A | A | A | A | A                 |
| 117,520,868    | G | G | G | G | G | G | G | G | G | G | G | G | G | G | G                 |
| 117,526,636    | A | G | G | G | G | G | G | G | G | G | G | G | G | G | G                 |
| 117,564,596    | A | G | G | G | G | G | G | G | G | G | G | G | G | G | G                 |
| 117,564,648    | A | G | G | G | G | G | G | G | G | G | G | G | G | G | G                 |
| 117,570,057    | G | C | C | C | C | C | C | C | C | C | C | C | C | C | C                 |
| 117,571,102    | C | T | T | T | T | T | T | T | T | T | T | T | T | T | T                 |
| 117,571,567    | A | C | C | C | C | C | C | C | C | C | C | C | C | C | C                 |
| 117,571,663    | A | A | A | A | A | A | A | A | A | A | A | A | A | A | A                 |
| 117,574,274    | T | C | C | C | C | C | C | C | C | C | C | C | C | C | C                 |
| 117,610,233    | A | A | A | A | A | A | A | A | A | A | A | A | A | A | A                 |
| 117,622,393    | C | C | C | C | C | C | C | C | C | C | C | C | C | C | C                 |
| 117,622,520    | A | A | A | A | A | A | A | A | A | A | A | A | A | A | A                 |
| 117,622,892    | A | T | T | T | T | T | T | T | T | T | T | T | T | T | T                 |
| 117,631,174    | C | T | T | T | T | T | T | T | T | T | T | T | T | T | T                 |
| 117,646,907    | A | A | A | A | A | A | A | A | A | A | A | A | A | A | A                 |
| 117,647,077    | G | G | G | G | G | G | G | G | G | G | G | G | G | G | G                 |
| 117,680,870    | G | G | G | G | G | G | G | G | G | G | G | G | G | G | G                 |
| 117,695,225    | A | C | C | C | C | C | C | C | C | C | C | C | C | C | C                 |
| 117,727,247    | G | G | G | G | G | G | G | G | G | G | G | G | G | G | G                 |

CFTR

J44/XbaI

(GATT)<sub>n</sub> (CA)<sub>n</sub>

dF508 116,986,881 bp

(2694) 117,030,858 bp

M1101K 117,039,033 bp

(TA)<sub>n</sub>

(3601-65) 117,054,747 bp

J3.11/MspI

**Figure S2. Haplotypes of One *CFTR* p.Met1101Lys + p.Phe508del Compound Heterozygote (A) and Six *CFTR* p.Met1101Lys Homozygotes (1–6) across a ~1 Mb Region Surrounding *CFTR***

Positions (build36/hg18) of the two Hutterite CF mutations, p.Met1101Lys and p.Phe508del, as well as the approximate positions of polymorphic markers used in an early haplotype analysis of Met1101Lys haplotypes<sup>3</sup> are shown on the right. The haplotypes are designated *a*, *b*, and *c* to maintain consistency with Zielenski et al. Subject A is a compound heterozygote for p.Met1101Lys and p.Phe508del (on haplotype *a*), subjects 1-5 are homozygous for p.Met1101Lys on haplotype *b*, and subject 6 is homozygous for p.Met1101Lys on haplotypes *b* and *c*. Blue boxes highlight the SNPs at which haplotype *a* differs from haplotype *b*, and red boxes highlight differences between haplotypes *c* and *b*. Zielenski et al. proposed that haplotype *c* was derived from haplotype *b* through a recombination within *CFTR* between marker 2694 and p.Met1101Lys because the markers distal to p.Met1101Lys that were used in their study were identical on haplotypes *b* and *c*.<sup>3</sup> However, the additional SNP genotypes in our study revealed four mismatches between *b* and *c* distal to p.Met1101Lys, suggesting that *c* is either the result of two recombination that left almost none of *b* on the new haplotype, or that *c* is a distinct p.Met1101Lys -bearing haplotype that was independently introduced by a second Hutterite founder.

S3

*ZMPSTE24*

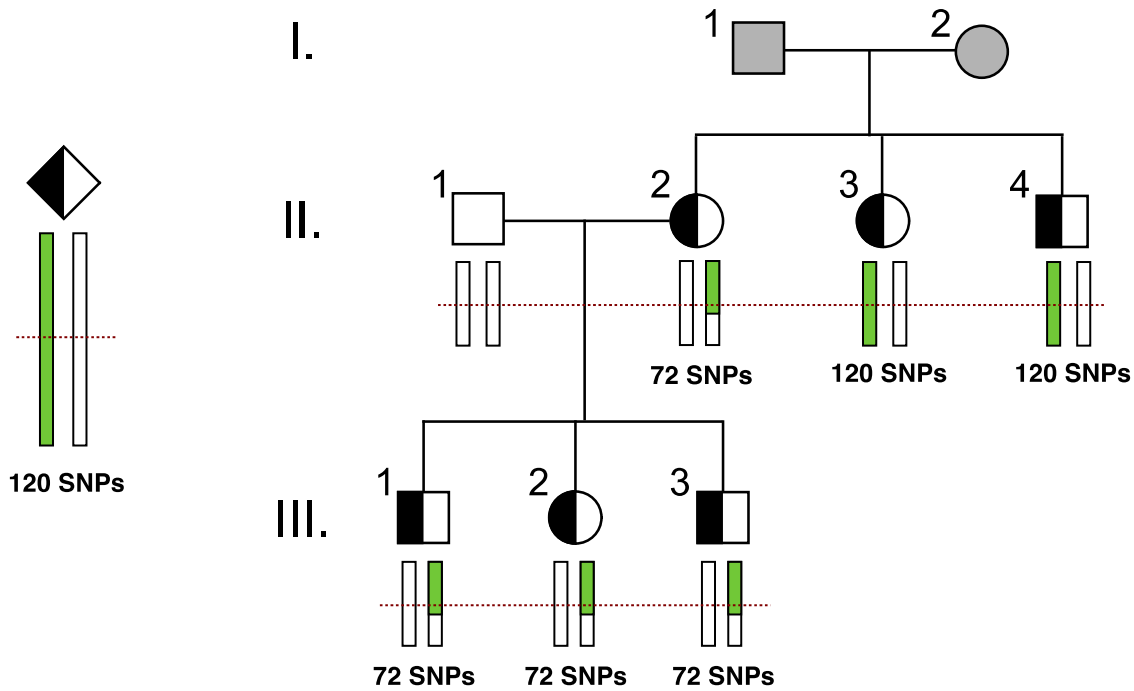

**Figure S3. Pedigree and Haplotypes of Family Carrying *ZMPSTE24* c.1085dupT on a Recombinant Haplotype**

The diamond carrier on the left represents the consensus haplotype (green) shared IBS $\geq$ 1 by all carriers of this deletion except the individuals shown in this figure. White chromosomes represent unknown haplotypes. The dashed lines represent the approximate location of the mutation on the haplotype. In this family, the mother (II.2) inherited a small portion of the consensus haplotype while two of her siblings (II.3, II.4) inherited the full consensus haplotype, allowing us to infer that she inherited a recombinant version of the shared haplotype that bears the deletion and passed it on to three of her children (III.1-3).

**Table S1. Summary of AR Diseases Reported in the Hutterites (Modified and Updated from Boycott et al. 2008)**

| Name of Disease                                         | Abbrev. | OMIM   | Gene/Locus | Chr | Mutation (Common Name) | HGVS Name(s)                                                  | rsID        | In This Study | Refs.                              |
|---------------------------------------------------------|---------|--------|------------|-----|------------------------|---------------------------------------------------------------|-------------|---------------|------------------------------------|
| Bardet-Biedl syndrome                                   | BBS     | 209900 | BBS2       | 16  | IVS3-2A>G              | NM_031885.3:c.472-2A>G                                        | rs137854887 | Yes           | 4                                  |
| Bowen-Conradi syndrome                                  | BCS     | 211180 | EMG1       | 12  | p.D86G                 | NM_006331.7:c.257A>G<br>NP_006322.4:p.Asp86Gly                | rs74435397  | No            | 5                                  |
| Carnitine Palmitoyltransferase I deficiency             | CPT1    | 255120 | CPT1A      | 11  | p.G710E                | NM_001876.3:c.2129G>A<br>NP_001867.2:p.Gly710Glu              | rs80356780  | No            | 6,7                                |
| Cataracts (juvenile)                                    | JC      | 212500 | -          | -   | -                      | -                                                             | -           | No            | 8,9                                |
| Cerebro-osteo-nephrodysplasia                           | COND    | 236450 | -          | -   | -                      | -                                                             | -           | No            | 10-12                              |
| Combined pituitary hormone deficiency                   | CPHD    | 262600 | PROP1      | 5   | c.301_302delAG         | NM_006261.4:c.301_302delAG<br>NP_006252.3:p.Ser101=fs         | rs193922688 | No            | 13,14                              |
| Cystic fibrosis                                         | CF      | 219700 | CFTR       | 7   | p.F508del              | NM_000492.3:c.1521_1523delCTT<br>NP_000483.3:p.Ile507_Phe508? | rs113993960 | Yes           | 3,15                               |
|                                                         |         |        |            |     | p.M1101K               | NM_000492.3:c.3302T>A<br>NP_000483.3:p.Met1101Lys             | rs36210737  | Yes           | 3,15                               |
| Dilated cardiomyopathy with ataxia syndrome             | DCMA    | 610198 | DNAJC19    | 3   | IVS3-1G>C              | NM_145261.3:c.130-1G>C                                        | rs137854888 | Yes           | 16                                 |
| Dihydropyrimidine dehydrogenase deficiency              | DPD     | 274270 | -          | -   | -                      | -                                                             | -           | No            | 17                                 |
| Dopa-responsive dystonia                                | DRS     | 605407 | TH         | 11  | p.T494M                | NM_199292.2:c.1481C>T<br>NP_954986.2:p.Thr494Met              | rs45471299  | No            | personal observation <sup>18</sup> |
| Dysequilibrium syndrome                                 | DES-H   | 224050 | VLDLR      | 9   | deletion (199 kb)      | -                                                             | -           | No            | 19,20                              |
| Forehead, Abnormal Heart, Renal, Rhino                  | FARR    | 613680 | 16p13.3    | -   | -                      | -                                                             | -           | No            | 21                                 |
| Hypophosphatasia                                        |         | 241500 | ALPL       | 1   | p.G317D                | NM_000478.4:c.1001G>A<br>NP_000469.3:p.Gly334Asp              | rs121918009 | No            | personal observation <sup>18</sup> |
| Iodide transporter defect                               | ITD     | 274400 | SLC5A5     | 19  | p.G395R                | NM_000453.2:c.1183G>A<br>NP_000444.1:p.Gly395Arg              | rs121909180 | No            | 22,23                              |
| Joubert syndrome/Meckel syndrome                        | JBTS    | 614424 | TMEM237    | 2   | p.R18X                 | NM_001044385.1:c.52C>T<br>NP_001037850.1:p.Arg18Ter           | rs199469707 | Yes           | 24                                 |
| Leigh disease                                           |         | 256000 | -          | -   | -                      | -                                                             | -           | No            | 25                                 |
| Limb girdle muscular dystrophy 2H/Sarcotubular myopathy | LGMD2H  | 254110 | TRIM32     | 9   | p.D487N                | NM_001099679.1:c.1459G>A<br>NP_001093149.1:p.Asp487Asn        | rs111033570 | Yes           | 26                                 |
| Limb girdle muscular dystrophy 2I                       | LGMD2I  | 607155 | FKRP       | 19  | p.L276I                | NM_024301.4:c.826C>A<br>NP_077277.1:p.Leu276Ile               | rs28937900  | Yes           | 27                                 |
| Mandibulofacial dysostosis                              |         | 248390 | -          | -   | -                      | -                                                             | -           | No            | 28                                 |
| Maple syrup urine disease                               | MSUD    | 248600 | -          | -   | -                      | -                                                             | -           | No            | personal observation <sup>18</sup> |
| Methylmalonic aciduria                                  | MMA     | 251000 | -          | -   | -                      | -                                                             | -           | No            | 29                                 |
| Morquio syndrome                                        |         | 253000 | -          | -   | -                      | -                                                             | -           | No            | 30                                 |
| Nephronophthisis - juvenile                             | JNPHP   | 256100 | NPHP1      | 2   | 290 kb deletion        | -                                                             | -           | No            | personal                           |

|                                   |        |        |          |    |                       |                                                          |             |     | observation <sup>18</sup> |
|-----------------------------------|--------|--------|----------|----|-----------------------|----------------------------------------------------------|-------------|-----|---------------------------|
| Nonsyndromic mental retardation   | MRT14  | 614020 | TECR     | 19 | p.P182L               | NM_138501.5:c.545C>T<br>NP_612510.1:p.Pro182Leu          | rs199469705 | Yes | 31                        |
| Oculocutaneous albinism (type 1A) | OCA1A  | 203100 | TYR      | 11 | p.C91Y                | NM_000372.4:c.272G>A<br>NP_000363.1:p.Cys91Tyr           | rs137854890 | Yes | this study                |
| Restrictive Dermopathy            | RD     | 275210 | ZMPSTE24 | 1  | c.1085dupT            | NM_005857.3:c.1078dupT<br>NP_005848.2:p.Cys359_Phe360?fs | rs137854889 | Yes | this study, <sup>32</sup> |
| Sensorineural deafness            | DFNB1A | 220290 | GJB2     | 13 | c.35delG              | NM_004004.5:c.35delG<br>NP_003995.2:p.Gly12Valfs         | rs80338939  | Yes | this study                |
| Sitosterolemia                    | STSL   | 210250 | ABCG8    | 2  | p.S107X               | NM_022437.2:c.320C>G<br>NP_071882.1:p.Ser107Ter          | rs137854891 | Yes | 33                        |
| Spinal muscular atrophy type III  | SMA    | 253400 | SMN1     | 5  | del. including exon 7 | -                                                        | -           | Yes | 34                        |
| Usher syndrome Type 1F            | USH1F  | 602083 | PCDH15   | 10 | c.1471delT            | NM_001142763.1:c.1101delT<br>NP_001136235.1:p.Leu368fs*  | rs199469706 | Yes | 35                        |

Both the “common” mutation names are provided as well as HGVS names; in some cases the common name has become outdated as the coding sequence of the genes have been revised since the original mutation publication.

**Table S2. List of AR Mutations and Genotyping Method Used for Carrier Screening in This Study**

| Disease                                            | Gene            | Mutation     | Genotyping Method                          |
|----------------------------------------------------|-----------------|--------------|--------------------------------------------|
| Bardet-Biedl syndrome (BBS)                        | <i>BBS2</i>     | IVS3-2A>G    | SNaPshot                                   |
| Cystic fibrosis (CF)                               | <i>CFTR</i>     | p.Met1101Lys | SNaPshot and <sup>36</sup>                 |
|                                                    |                 | p.Phe508del  | SNaPshot and <sup>36</sup>                 |
| Dilated cardiomyopathy with ataxia syndrome (DCMA) | <i>DNAJC19</i>  | IVS3-1G>C    | SNaPshot                                   |
| Joubert syndrome (JBTS)                            | <i>TMEM237</i>  | p.Arg18Ter   | Taqman <sup>24</sup>                       |
| Limb girdle muscular dystrophy 2H (LGMD2H)         | <i>TRIM32</i>   | p.Asp487Asn  | SNaPshot                                   |
| Limb girdle muscular dystrophy 2I (LGMD2I)         | <i>FKRP</i>     | p.Leu276Ile  | TaqMan                                     |
| Nonsyndromic deafness (DFNB1A)                     | <i>GJB2</i>     | c.35delG     | fluorescent PCR and fragment size analysis |
| Nonsyndromic mental retardation (NSMR)             | <i>TECR</i>     | p.Pro182Leu  | TaqMan <sup>31</sup>                       |
| Oculocutaneous albinism Type 1A (OCA1A)            | <i>TYR</i>      | p.Cys91Tyr   | OpenArray                                  |
| Restrictive dermopathy (RD)                        | <i>ZMPSTE24</i> | c.1085dupT   | fluorescent PCR and fragment size analysis |
| Sitosterolemia (STSL)                              | <i>ABCG8</i>    | p.Ser107Ter  | SNaPshot                                   |
| Spinal muscular atrophy Type III (SMA)             | <i>SMN1</i>     | exon 7 del.  | haplotype analysis <sup>34</sup>           |
| Usher syndrome Type 1F (USH1F)                     | <i>PCDH15</i>   | c.1471delT   | SNaPshot                                   |

## References

1. Chaki, M., Sengupta, M., Mukhopadhyay, A., Subba Rao, I., Majumder, P.P., Das, M., Samanta, S., and Ray, K. (2006). OCA1 in different ethnic groups of India is primarily due to founder mutations in the tyrosinase gene. *Ann Human Genet* 70, 623–630.
2. Kenneson, A., Van Naarden Braun, K., and Boyle, C. (2002). GJB2 (connexin 26) variants and nonsyndromic sensorineural hearing loss: a HuGE review. *Genet Med* 4, 258–274.
3. Zielenski, J., Fujiwara, T.M., Markiewicz, D., Paradis, A.J., Anacleto, A.I., Richards, B., Schwartz, R.H., Klinger, K.W., Tsui, L.C., and Morgan, K. (1993). Identification of the M1101K mutation in the cystic fibrosis transmembrane conductance regulator (CFTR) gene and complete detection of cystic fibrosis mutations in the Hutterite population. *Am J Hum Genet* 52, 609–615.
4. Innes, A.M., Boycott, K.M., Puffenberger, E.G., Redl, D., MacDonald, I.M., Chudley, A.E., Beaulieu, C., Perrier, R., Gillan, T., Wade, A., et al. (2010). A founder mutation in BBS2 is responsible for Bardet-Biedl syndrome in the Hutterite population: utility of SNP arrays in genetically heterogeneous disorders. *Clin Genet* 78, 424–431.
5. Armistead, J., Khatkar, S., Meyer, B., Mark, B.L., Patel, N., Coghlan, G., Lamont, R.E., Liu, S., Wiechert, J., Cattini, P.A., et al. (2009). Mutation of a Gene Essential for Ribosome Biogenesis, EMG1, Causes Bowen-Conradi Syndrome. *Am J Hum Genet* 84, 728–739.
6. Prasad, C., Johnson, J.P., Bonnefont, J.P., Dilling, L.A., Innes, A.M., Haworth, J.C., Beischel, L., Thuillier, L., Prip-Buus, C., Singal, R., et al. (2001). Hepatic carnitine palmitoyl transferase 1 (CPT1 A) deficiency in North American Hutterites (Canadian and American): evidence for a founder effect and results of a pilot study on a DNA-based newborn screening program. *Mol Genet Metab* 73, 55–63.
7. Prip-Buus, C., Thuillier, L., Abadi, N., Prasad, C., Dilling, L., Klasing, J., Demaugre, F., Greenberg, C.R., Haworth, J.C., Droin, V., et al. (2001). Molecular and enzymatic characterization of a unique carnitine palmitoyltransferase 1A mutation in the Hutterite community. *Mol Genet Metab* 73, 46–54.
8. Lowry, R.B., Machin, G.A., Morgan, K., Mayock, D., and Marx, L. (1985). Congenital contractures, edema, hyperkeratosis, and intrauterine growth retardation: a fatal syndrome in Hutterite and Mennonite kindreds. *Am J Med Genet* 22, 531–543.
9. Pearce, W.G., Mackay, J.A., Holmes, T.M., Morgan, K., Fowlow, S.B., Shokeir, M.H., and Lowry, R.B. (1987). Autosomal recessive juvenile cataract in Hutterites. *Ophthalmic Paediatr Genet* 8, 119–124.
10. Innes, A.M., and Farr, C. (2003). Further delineation of the Hutterite cerebro-osteo-nephrodysplasia syndrome. *Proc Greenwood Genet Cen* 22.
11. Opitz, J.M., Lowry, R.B., Holmes, T.M., and Morgan, K. (1985). Hutterite cerebro-osteo-nephrodysplasia: autosomal recessive trait in a Lehrerleut Hutterite family from Montana. *Am J Med Genet* 22, 521–529.
12. Lowry, R.B. (1997). A further case of Hutterite cerebro-osteo-nephrodysplasia. *Am J Med Genet* 72, 386.
13. Wu, W., Cogan, J.D., Pfäffle, R.W., Dasen, J.S., Frisch, H., O'Connell, S.M., Flynn, S.E., Brown, M.R., Mullis, P.E., Parks, J.S., et al. (1998). Mutations in PROP1 cause familial combined pituitary hormone deficiency. *Nat Genet* 18, 147–149.
14. McArthur, R.G., Morgan, K., Phillips, J.A., Bala, M., and Klassen, J. (1985). The natural history of

familial hypopituitarism. *Am J Med Genet* 22, 553–566.

15. Klinger, K., Horn, G.T., Stanislovitis, P., Schwartz, R.H., Fujiwara, T.M., and Morgan, K. (1990). Cystic fibrosis mutations in the Hutterite Brethren. *Am J Hum Genet* 46, 983–987.

16. Davey, K.M., Parboosingh, J.S., McLeod, D.R., Chan, A., Casey, R., Ferreira, P., Snyder, F.F., Bridge, P.J., and Bernier, F.P. (2006). Mutation of DNAJC19, a human homologue of yeast inner mitochondrial membrane co-chaperones, causes DCMA syndrome, a novel autosomal recessive Barth syndrome-like condition. *J Med Genet* 43, 385–393.

17. Adolph, K.J., Fung, E., McLeod, D.R., Morgan, K., and Snyder, F.F. (1991). Dihydropyrimidine dehydrogenase deficiency in a Hutterite newborn. *Adv. Exp. Med. Biol.* 309B, 311–314.

18. Boycott, K.M., Parboosingh, J.S., Chodirker, B.N., Lowry, R.B., Mcleod, D.R., Morris, J., Greenberg, C.R., Chudley, A.E., Bernier, F.P., Midgley, J., et al. (2008). Clinical genetics and the Hutterite population: A review of Mendelian disorders. *Am J Med Genet* 146A, 1088–1098.

19. Boycott, K.M., Flavelle, S., Bureau, A., Glass, H.C., Fujiwara, T.M., Wirrell, E., Davey, K., Chudley, A.E., Scott, J.N., Mcleod, D.R., et al. (2005). Homozygous deletion of the very low density lipoprotein receptor gene causes autosomal recessive cerebellar hypoplasia with cerebral gyral simplification. *Am J Hum Genet* 77, 477–483.

20. Glass, H.C., Boycott, K.M., Adams, C., Barlow, K., Scott, J.N., Chudley, A.E., Fujiwara, T.M., Morgan, K., Wirrell, E., and Mcleod, D.R. (2005). Autosomal recessive cerebellar hypoplasia in the Hutterite population. *Dev Med Child Neurol* 47, 691–695.

21. Boycott, K.M., Beaulieu, C., Puffenberger, E.G., Mcleod, D.R., Parboosingh, J.S., and Innes, A.M. (2010). A novel autosomal recessive malformation syndrome associated with developmental delay and distinctive facies maps to 16ptel in the Hutterite population. *Am J Med Genet A* 152A, 1349–1356.

22. Couch, R.M., Dean, H.J., and Winter, J.S. (1985). Congenital hypothyroidism caused by defective iodide transport. *J. Pediatr.* 106, 950–953.

23. Kosugi, S., Bhayana, S., and Dean, H.J. (1999). A novel mutation in the sodium/iodide symporter gene in the largest family with iodide transport defect. *J Clin Endocrinol Metab* 84, 3248–3253.

24. Huang, L., Szymanska, K., Jensen, V.L., Janecke, A.R., Innes, A.M., Davis, E.E., Frosk, P., Li, C., Willer, J.R., Chodirker, B.N., et al. (2011). TMEM237 is mutated in individuals with a Joubert syndrome related disorder and expands the role of the TMEM family at the ciliary transition zone. *Am J Hum Genet* 89, 713–730.

25. Huntsman, R.J., Sinclair, D.B., Bhargava, R., and Chan, A. (2005). Atypical presentations of leigh syndrome: a case series and review. *Pediatr. Neurol.* 32, 334–340.

26. Frosk, P., Weiler, T., Nylen, E., Sudha, T., Greenberg, C.R., Morgan, K., Fujiwara, T.M., and Wrogemann, K. (2002). Limb-girdle muscular dystrophy type 2H associated with mutation in TRIM32, a putative E3-ubiquitin-ligase gene. *Am J Hum Genet* 70, 663–672.

27. Frosk, P., Lamont, R., Brunham, L., Weiler, T., and Nylen, E. (2002). Genetic heterogeneity of limb girdle muscular dystrophy in Hutterites. *J Neurol Sci* 199.

28. Lowry, R.B., Morgan, K., Holmes, T.M., Metcalf, P.J., and Stauffer, G.F. (1985). Mandibulofacial dysostosis in Hutterite sibs: a possible recessive trait. *Am J Med Genet* 22, 501–512.

29. Fowlow, S.B., Holmes, T.M., Morgan, K., and Snyder, F.F. (1985). Screening for methylmalonic aciduria



in Alberta: a voluntary program with particular significance for the Hutterite Brethren. *Am J Med Genet* 22, 513–519.

30. Lowry, R.B., Snyder, F.F., Wesenberg, R.L., Machin, G.A., Applegarth, D.A., Morgan, K., Carter, R.J., Toone, J.R., Holmes, T.M., and Dewar, R.D. (1985). Morquio syndrome (MPS IVA) and hypophosphatasia in a Hutterite kindred. *Am J Med Genet* 22, 463–475.

31. Caliřkan, M., Chong, J.X., Uricchio, L., Anderson, R., Chen, P., Sougnez, C., Garimella, K., Gabriel, S.B., DePristo, M.A., Shakir, K., et al. (2011). Exome sequencing reveals a novel mutation for autosomal recessive non-syndromic mental retardation in the *TECR* gene on chromosome 19p13. *Hum Mol Genet* 20, 1285–1289.

32. Loucks, C., Parboosingh, J.S., Chong, J.X., Ober, C., Siu, V.M., Hegele, R.A., Rupar, C.A., Mcleod, D.R., Pinto, A., Chudley, A.E., et al. (2012). A shared founder mutation underlies restrictive dermopathy in Old Colony (Dutch-German) Mennonite and Hutterite patients in North America. *Am J Med Genet A* 158A, 1229–1232.

33. Mymin, D., Wang, J., Frohlich, J., and Hegele, R.A. (2003). Image in cardiovascular medicine. Aortic xanthomatosis with coronary ostial occlusion in a child homozygous for a nonsense mutation in *ABCG8*. *Circulation* 107, 791.

34. Chong, J.X., Oktay, A.A., Dai, Z., Swoboda, K.J., Prior, T.W., and Ober, C. (2011). A common spinal muscular atrophy deletion mutation is present on a single founder haplotype in the US Hutterites. *Eur J Hum Genet* 19, 1045–1051.

35. Alagramam, K.N., Yuan, H., Kuehn, M.H., Murcia, C.L., Wayne, S., Srisailpathy, C.R., Lowry, R.B., Knaus, R., Van Laer, L., Bernier, F.P., et al. (2001). Mutations in the novel protocadherin *PCDH15* cause Usher syndrome type 1F. *Hum Mol Genet* 10, 1709–1718.

36. Gallego Romero, I., and Ober, C. (2008). *CFTR* mutations and reproductive outcomes in a population isolate. *Hum Genet* 122, 583–588.
